# Supplementary material
Source: HighWire-hosted journal article supplement (https://www.jpn.ca/highwire/filestream/89646/field_highwire_adjunct_files/0/200185-a1.pdf)
Supplement: 200185-a1.pdf [file 200185-a1.pdf]

Appendix 1 to Khayachi A, Ase A, Liao C, et al. Chronic lithium treatment alters the excitatory/inhibitory balance of synaptic networks and reduces mGluR5-PKC signalling in mouse cortical neurons. J Psychiatry Neurosci 2021. doi: 10.1503/jpn.200185

Copyright © 2021 The Author(s) or their employer(s).

To receive this resource in an accessible format, please contact us at [cmajgroup@cmaj.ca](mailto:cmajgroup@cmaj.ca).

Online appendices are unedited and posted as supplied by the authors.

1

2

## Supplementary Information

3

# 4 **Chronic lithium treatment alters the excitatory/inhibitory balance** 5 **of synaptic networks and reduces mGluR5-PKC signaling**

6 *Khayachi et al.,*

7

8

Appendix 1 to Khayachi A, Ase A, Liao C, et al. Chronic lithium treatment alters the excitatory/inhibitory balance of synaptic networks and reduces mGluR5-PKC signalling in mouse cortical neurons. J Psychiatry Neurosci 2021. doi: 10.1503/jpn.200185

Copyright © 2021 The Author(s) or their employer(s).

To receive this resource in an accessible format, please contact us at [cmajgroup@cmaj.ca](mailto:cmajgroup@cmaj.ca).

Online appendices are unedited and posted as supplied by the authors.

9

## Supplementary Materials and Methods

### 10 Confocal imaging

11

12 *Image acquisition:* For fixed cells, confocal images (1024 × 1024) were acquired with a ×63 oil  
13 immersion lens (numerical aperture NA 1.4) on an SP8 confocal microscope (Leica Microsystems). Z-  
14 series of 8 images of randomly selected secondary/tertiary dendrites were compressed in 2D using  
15 the max projection function in image j (FIJI).

16

17 *Dendritic spine imaging and analysis:* Neurons were transduced at 16 DIV by AAV to express GFP  
18 under a human Synapsin promoter for 48h. Cells were then fixed at 18 DIV in 3.7% PFA + 5% sucrose  
19 for 1h at RT and mounted in Prolong before confocal examination. About 4200–4800 spines were  
20 analyzed per condition (two to four dendrites per neuron and from 35 to 40 neurons per condition  
21 from four independent experiments). At the time of acquisition, laser power was adjusted so that all  
22 spines were below the saturation threshold. To analyze dendritic protrusions parameters, projection  
23 images were imported into NeuronStudio software (1), which allows for the automated detection of  
24 mushroom, stubby and thin dendritic spines. The length of individual spines was automatically  
25 measured, and data were imported in GraphPad Prism software for statistical analysis. Mushroom  
26 spines were characterized by a head diameter ranging from 0.3 to 2 μm and a spine length between  
27 0.3 and 5 μm. Stubby spines were identified by a head diameter ranging from 0.3 to 2 μm and a spine  
28 length between 0.1 and 0.8 μm. Finally, thin and filopodia spines corresponded to protrusions with a  
29 head diameter below 0.3 μm and a spine length ranging from 0.1 to 6 μm.

30

31 *Synapse quantification:* Co-clusters (VGlut1-PSD95 and VGAT-Gephyrin) co-occurring with GFP were  
32 quantified with SynapCountJ, an imageJ plugin(2).

33

34 *Pre and postsynaptic puncta quantification:* Vglut1, VGAT, PSD95 and Gephyrin puncta co-occurring  
35 with GFP were quantified by Cell profiler software(3).

36

### 37 Immunocytochemistry

38

39 Neurons (19–20 DIV) were fixed in phosphate-buffered saline (PBS) containing 3.7% formaldehyde  
40 and 5% sucrose for 1 h at room temperature (RT), then in NH<sub>4</sub>Cl (50mM) for 10 min. Neurons were  
41 then permeabilized for 20 min in PBS containing 0.1% Triton X-100 and 10% goat serum (GS) at RT  
42 and immunostained with a guinea-pig polyclonal anti-vglut1 (1/4000; Millipore AB5905), a rabbit  
43 anti-psd95 clone K28/43 (1/1000; NeuroMab), a rabbit anti-vgat (1/500; Synaptic Systems 131002), a  
44 mouse monoclonal anti-gephyrin (1/500; Synaptic Systems 147111), antibodies in PBS containing  
45 0.05% Triton X-100 and 5% GS. Cells were washed three times in PBS and incubated with the  
46 appropriate secondary antibodies (1/1000) conjugated to Alexa 594 or Alexa647 and mounted with  
47 Prolong (ThermoFisher P36930) until confocal examination.

48

49

### 50 Cell viability test

51

Appendix 1 to Khayachi A, Ase A, Liao C, et al. Chronic lithium treatment alters the excitatory/inhibitory balance of synaptic networks and reduces mGluR5-PKC signalling in mouse cortical neurons. J Psychiatry Neurosci 2021. doi: 10.1503/jpn.200185

Copyright © 2021 The Author(s) or their employer(s).

To receive this resource in an accessible format, please contact us at [cmajgroup@cmaj.ca](mailto:cmajgroup@cmaj.ca).

Online appendices are unedited and posted as supplied by the authors.

52 Cell Counting kit 8 using (2-(2-methoxy-4-nitrophenyl)-3-(4-nitrophenyl)-5-(2,4-disulfophenyl)-2H-  
53 tetrazolium, monosodium salt) (WST-8/CCK-8; Sigma 96992) is a cell viability assay. Briefly, the kit  
54 uses a water-soluble tetrazolium salt to quantify the number of live cells by producing an orange  
55 formazan dye upon bio-reduction in the presence of an electron carrier. WST-8/CCK-8 is added  
56 directly to the cells for 1h where it is reduced by cellular dehydrogenases to an orange formazan  
57 product that is soluble in tissue culture medium. The amount of formazan produced is directly  
58 proportional to the number of living cells and is measured by absorbance at 460 nm.

59

#### 60 **Immunoblot**

61

62 Neurons at 18 DIV were homogenized in lysis buffer (10 mM Tris-HCl pH7.5, 10 mM EDTA, 150 mM  
63 NaCl, 1% Triton X100, 0.1% SDS) in the presence of a mammalian protease inhibitor cocktail (Sigma,  
64 1/100 P8340) and phosphoSTOP (Sigma 4906845001) to protect proteins from dephosphorylation.  
65 Protein extracts (20-40µg) were resolved by SDS-PAGE, transferred onto PVDF membrane (Millipore  
66 IPFL00010), immunoblotted with the indicated concentration of primary antibodies: rabbit polyclonal  
67 anti-psd95 clone K28/43 (1/2000; NeuroMab); rabbit monoclonal anti-GluA1 (1/1000; Millipore 05-  
68 855R), rabbit anti-GluA2 (1/2000; Sigma AB1768-I), rabbit anti-Synapsin1 (1/1000 Millipore AB1543P),  
69 rabbit anti-phospho-GSK3b (1/1000; New England BioLabs 9323), rabbit anti-phospho- PKCγ  
70 (Thr514) (1/1000; New England BioLabs 9379). Standard GAPDH loading controls were included using  
71 a mouse monoclonal anti-GAPDH antibody (1/2000, ThermoFisher MAB5-15738). Then membrane  
72 was revealed using the appropriate LI-COR fluophore-conjugated secondary antibodies. Images were  
73 acquired on a LI-COR Odyssey Infrared image system. Fluorescence intensity values for each protein  
74 of interest were normalized to GAPDH signal from the same gel. Full-size blots for cropped gels can  
75 be found in Supplementary figure 6.

76

#### 77 **Electrophysiological recordings and analyses**

78

79 All electrophysiological signals were acquired using Multiclamp 700B amplifier digitized at 10kHz and  
80 pClamp10 software. Data were analyzed in Clampfit10 (Molecular Devices).

81

82 *External and internal solutions:* Neurons at 18 to 20 DIV on coverslips were transferred to a recording  
83 chamber in a recording buffer containing (in mM): 167 NaCl, 10 D-glucose, 10 HEPES, 2.4 KCl, 1  
84 MgCl<sub>2</sub>, and 2 CaCl<sub>2</sub> (300-310 mOsm, pH adjusted to 7.4 with NaOH). Whole cell patch clamp  
85 experiments were carried out at RT (22-25 °C) on pyramidal cell looking from cultured mouse cortical  
86 neurons.

87 For mEPSC and mIPSC recordings, pipettes were filled with a Cesium based solution containing (in  
88 mM): 130 CsMeSO<sub>4</sub>, 5 CsCl, 4 NaCl, 1 MgCl<sub>2</sub>, 10 HEPES, 5 EGTA, 5 QX-314 Cl, 0.5 GTP, 10 Na-  
89 phosphocreatine, 5 MgATP, 0.1 Spermine and 181 units Creatine phosphokinase (290 mOsm, pH  
90 adjusted to 7.3 with CsOH). For current clamps experiments and sodium/potassium currents  
91 recordings, pipettes were filled with a potassium-based solution containing (in mM): 145 K-  
92 gluconate, 3 NaCl, 1 MgCl<sub>2</sub>, 1 EGTA, 0.3 CaCl<sub>2</sub>, 2 Na-ATP, 0.3 Na-GTP, 0.2 cAMP and 10 HEPES (290  
93 mOsm, pH adjusted to 7.3 with KOH). Patch pipettes displayed a resistance of 4-7 MΩ.

94

95 *Synaptic events recordings:* mEPSCs and mIPSCs were recorded in voltage clamp mode, holding cells  
96 at -70 and 10mV respectively. In the external solution 1µM of Tetrodotoxin (TTX, Tocris) and 100 µM

Appendix 1 to Khayachi A, Ase A, Liao C, et al. Chronic lithium treatment alters the excitatory/inhibitory balance of synaptic networks and reduces mGluR5-PKC signalling in mouse cortical neurons. J Psychiatry Neurosci 2021. doi: 10.1503/jpn.200185

Copyright © 2021 The Author(s) or their employer(s).

To receive this resource in an accessible format, please contact us at [cmajgroup@cmaj.ca](mailto:cmajgroup@cmaj.ca).

Online appendices are unedited and posted as supplied by the authors.

97 picrotoxin (PTX, Tocris) were added for mEPSCs recordings and 1 $\mu$ M of Tetrodotoxin (TTX) and 50  $\mu$ M  
98 of 6-cyano-7-nitroquinoxaline-2,3-dione (CNQX, Tocris) for mIPSCs recordings. Synaptic events were  
99 sampled for 5min and then exported to Clampfit 10.7 software with which the amplitude and  
100 frequency of synaptic events were quantified (threshold 6pA); all events were checked by eye and  
101 monophasic events were used for amplitude and decay kinetics, while others were suppressed but  
102 included in frequency counts as in these studies(4, 5). Tolerance for series resistance (Rs) was <35  
103 M $\Omega$  and uncompensated;  $\Delta$ Rs tolerance cut-off was <20%.

104  
105 *Sodium and potassium currents:* Sodium and potassium currents were acquired in voltage-clamp  
106 mode. Sodium channel currents are reported as inward peak currents and potassium channel  
107 currents as outward currents during series of voltage steps of 10mV from -70mV to 20mV.

108  
109 *Neuronal excitability:* for assessing neuronal excitability, action potential (AP) firing was recorded in  
110 current-clamp mode in response to incremental, depolarizing current injections of 1s duration (20pA  
111 increment of 15 steps). The number of AP firing was plotted to the corresponding current steps using  
112 Clampfit 10.7 software. In current-clamp mode, the resting membrane potential of all cells was  
113 adjusted to -65mV by injection of a small negative current if needed.

114

#### 115 **Ratiometric measurement of calcium transients in cortical neurons**

116  
117 Mouse cortical neurons (17-20DIV) treated or not with lithium (1.5mM) for 7 days were loaded with  
118 5 $\mu$ M Fura-2 AM (Molecular Probes, Life Technologies) in 0.1 % BSA for 40 min, then washed for 30  
119 min with extracellular solution containing in mM: 152 NaCl, 5 KCl, 2 CaCl<sub>2</sub>, 1 MgCl<sub>2</sub>, 10 HEPES and 10  
120 glucose, pH 7.4, with or without LiCl at 37°C in 5% CO<sub>2</sub>. Regions of interest (fluorescent neurons)  
121 were selected using a Nikon TE2000-U inverted microscope. Fura-2 was excited at 340 nm and  
122 380 nm every second and emission at 510 nm was detected with a high-resolution cooled CCD  
123 camera (Cool Snap HQ, Roper Scientific-Photometrics) interfaced to a Pentium III PC. Changes in  
124 intracellular calcium levels were determined ratiometrically ( $\Delta$  340/380 ratios) using the MetaFluor  
125 7.0 software (Molecular Devices). For each dish, agonist-induced increase in intracellular calcium was  
126 measured by subtracting the baseline ratio (F<sub>0</sub>) from the peak ratio (F) of the response ( $\Delta$ F = F-F<sub>0</sub>).  
127 During recording, cells were constantly perfused with extracellular solution and subjected to  
128 different experimental conditions. All recordings were conducted at room temperature and cells  
129 were constantly exposed to TTX (1 $\mu$ M) and picrotoxin (100 $\mu$ M) or TTX + picrotoxin + glycine (1 $\mu$ M,  
130 Sigma), depending on the experimental conditions. L-glutamic acid (1 $\mu$ M, Sigma) was used as agonist  
131 for metabotropic and ionotropic receptors activation. NMDA (10 $\mu$ M, Sigma) was used for selective  
132 NMDA receptor-channel activation. DHPG (100 $\mu$ M, Sigma), in the presence of the NMDA antagonist  
133 amino-5-phosphonovaleric acid (AP-5, 50 $\mu$ M, Sigma), was used to activate mGluR1 and mGluR5  
134 receptors.

#### 135 **RNA extraction and RNA sequencing**

136  
137 Two cortical neuronal cultures chronically treated or not with LiCl (1 x10<sup>6</sup> cells for each sample) were  
138 collected at 18 DIV. Total RNA was extracted using miRNeasy kit (Qiagen, USA) according the

Appendix 1 to Khayachi A, Ase A, Liao C, et al. Chronic lithium treatment alters the excitatory/inhibitory balance of synaptic networks and reduces mGluR5-PKC signalling in mouse cortical neurons. *J Psychiatry Neurosci* 2021. doi: 10.1503/jpn.200185

Copyright © 2021 The Author(s) or their employer(s).

To receive this resource in an accessible format, please contact us at [cmajgroup@cmaj.ca](mailto:cmajgroup@cmaj.ca).

Online appendices are unedited and posted as supplied by the authors.

139 manufacturer's instructions. RNA was resuspended in RNase-free water. The RNA concentration was  
140 measured on the Synergy H4 microplate reader. RNA was sent to MacroGen Inc. for sequencing.  
141 Library preparation was done using the TruSeq Stranded Total RNA Kit (Illumina) with Ribo-Zero  
142 depletion. Sequencing was done on the NovaSeq 6000 at 150bp paired end reads with a total of  
143 113M reads.

144

#### 145 **Differential expression analysis and Pathway enrichment**

146

147 In brief, Salmon was used to pseudo-align FASTQ files against Ensembl v94(6). A likelihood ratio test  
148 was used to identify differentially expressed genes with sleuth, and a Wald test was used to get a  
149 beta-estimate(7). P-values were corrected using false-discovery rate (FDR) via Benjamini-  
150 Hochberg procedure. Enrichment in pathways and gene sets were investigated using Gene Network  
151 (genenetwork.nl)(8). For a detailed methodology on RNAseq processing, please see Liao et al.  
152 (2019)(9).

153

154

155

#### 156 **REFERENCES for Supplemental Materials and Methods**

- 157 1. Rodriguez A, Ehlenberger DB, Dickstein DL, Hof PR, Wearne SL. Automated three-dimensional  
158 detection and shape classification of dendritic spines from fluorescence microscopy images. *PLoS*  
159 *one*. 2008;3(4):e1997.
- 160 2. Mata G, Heras J, Morales M, Romero A, Rubio J. SynapCountJ --- a Tool for Analyzing Synaptic  
161 Densities in Neurons. 2015.
- 162 3. Kametsky L, Jones TR, Fraser A, Bray MA, Logan DJ, Madden KL, et al. Improved structure,  
163 function and compatibility for CellProfiler: modular high-throughput image analysis software.  
164 *Bioinformatics* (Oxford, England). 2011;27(8):1179-80.
- 165 4. Milnerwood AJ, Kaufman AM, Sepers MD, Gladding CM, Zhang L, Wang L, et al. Mitigation of  
166 augmented extrasynaptic NMDAR signaling and apoptosis in cortico-striatal co-cultures from  
167 Huntington's disease mice. *Neurobiology of disease*. 2012;48(1):40-51.
- 168 5. Brigidi GS, Sun Y, Beccano-Kelly D, Pitman K, Mobasser M, Borgland SL, et al. Palmitoylation  
169 of delta-catenin by DHHC5 mediates activity-induced synapse plasticity. *Nat Neurosci*.  
170 2014;17(4):522-32.
- 171 6. Patro R, Duggal G, Love MI, Irizarry RA, Kingsford C. Salmon provides fast and bias-aware  
172 quantification of transcript expression. *Nature methods*. 2017;14(4):417-9.
- 173 7. Pimentel H, Bray NL, Puente S, Melsted P, Pachter L. Differential analysis of RNA-seq  
174 incorporating quantification uncertainty. *Nature methods*. 2017;14(7):687-90.
- 175 8. Deelen P, van Dam S, Herkert JC, Karjalainen JM, Brugge H, Abbott KM, et al. Improving the  
176 diagnostic yield of exome-sequencing by predicting gene-phenotype associations using large-scale  
177 gene expression analysis. *Nature Communications*. 2019;10(1):2837.

Appendix 1 to Khayachi A, Ase A, Liao C, et al. Chronic lithium treatment alters the excitatory/inhibitory balance of synaptic networks and reduces mGluR5-PKC signalling in mouse cortical neurons. *J Psychiatry Neurosci* 2021. doi: 10.1503/jpn.200185

Copyright © 2021 The Author(s) or their employer(s).

To receive this resource in an accessible format, please contact us at [cmajgroup@cmaj.ca](mailto:cmajgroup@cmaj.ca).

Online appendices are unedited and posted as supplied by the authors.

178 9. Liao C, Sarayloo F, Vuokila V, Rochefort D, Akçimen F, Diamond S, et al. Transcriptomic  
179 changes resulting from *STK32B* overexpression identifies pathways potentially  
180 relevant to essential tremor. *bioRxiv*. 2019:552901.

181

182

Appendix 1 to Khayachi A, Ase A, Liao C, et al. Chronic lithium treatment alters the excitatory/inhibitory balance of synaptic networks and reduces mGluR5-PKC signalling in mouse cortical neurons. J Psychiatry Neurosci 2021. doi: 10.1503/jpn.200185

Copyright © 2021 The Author(s) or their employer(s).

To receive this resource in an accessible format, please contact us at cmajgroup@cmaj.ca.

Online appendices are unedited and posted as supplied by the authors.

183

## Supplementary Figures

184

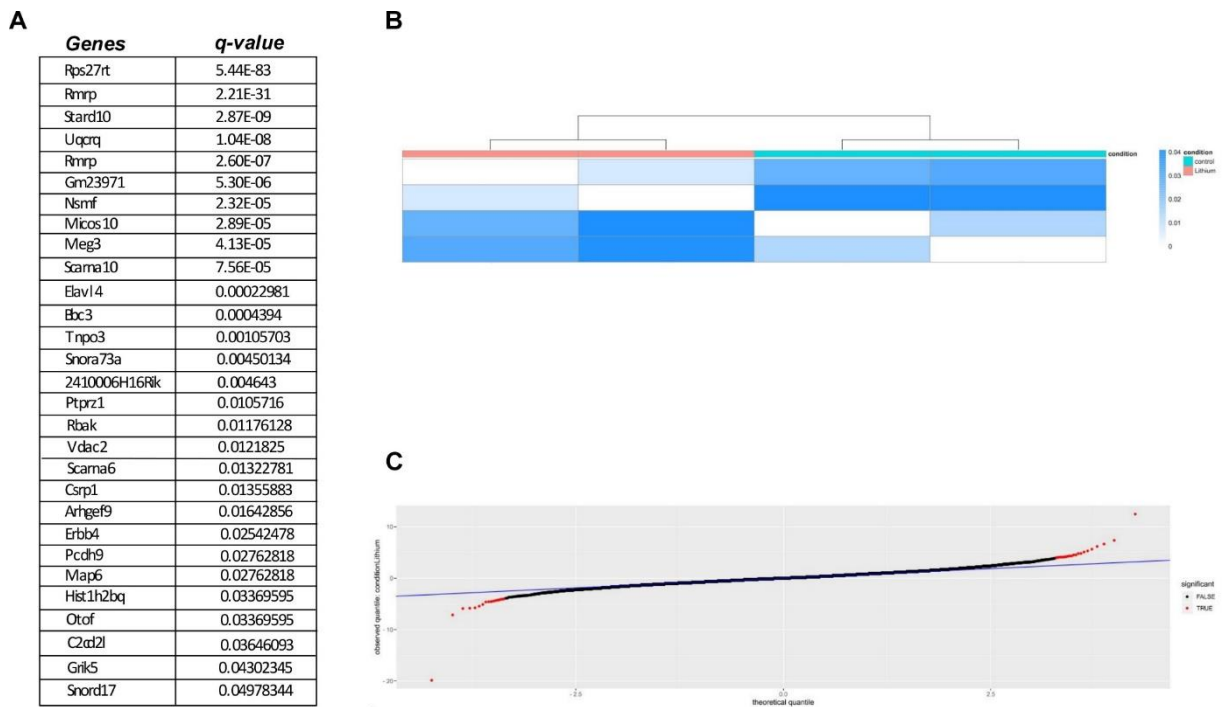

185

186

187 **Supplementary figure 1: Differentially expressed genes in lithium treated vs control cortical mouse**

188 neurons. **A)** List of genes that are differentially expressed in neurons chronically treated with LiCl

189 (1.5mM) for 7 days. **B)** Heat map of lithium and control samples. **C)** QQ-plot of RNAseq differential

190 expression data. Blue line shows expected values.

191

Copyright © 2021 The Author(s) or their employer(s).

To receive this resource in an accessible format, please contact us at [cmajgroup@cmaj.ca](mailto:cmajgroup@cmaj.ca).

Online appendices are unedited and posted as supplied by the authors.

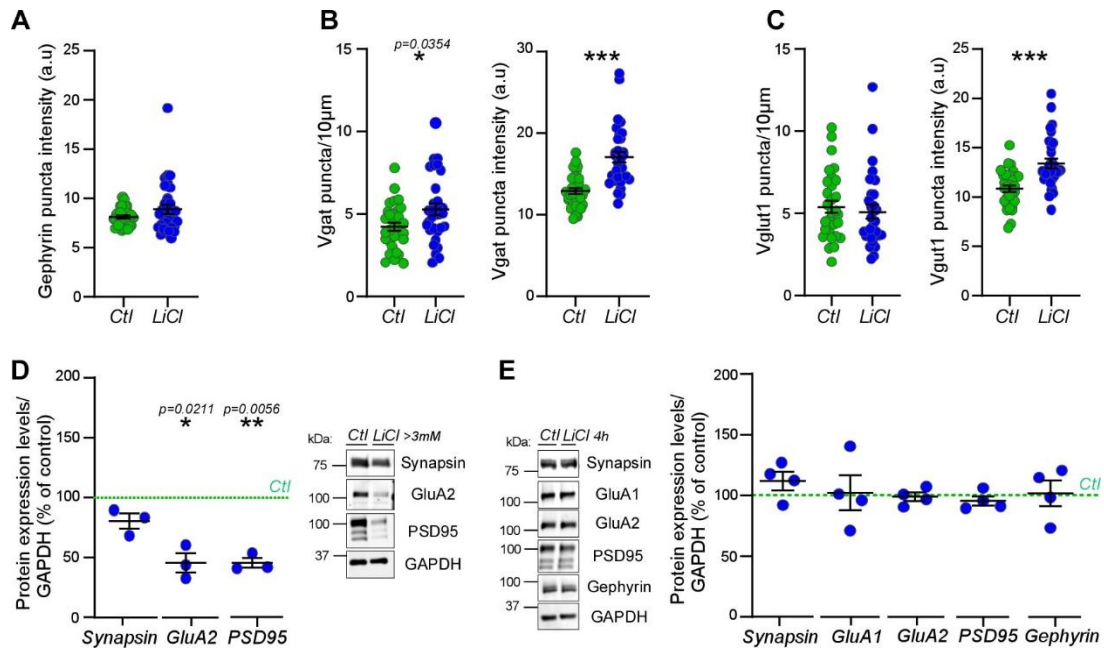

192

193 **Supplementary figure 2: Excitatory and inhibitory synaptic changes by chronic lithium treatment.**

194 **A)** Scatter plot show quantification of Gephyrin puncta intensity in neurons treated or not with LiCl.  
 195 **B)** Scatter plot show quantification of Vgat puncta density/10µm and Vgat puncta intensity of  
 196 secondary/tertiary dendrites from neurons treated or not with LiCl (1.5mM) for 7 days. N = 32  
 197 neurons per condition from three separate experiments. **c** Scatter plot show quantification of Vglut1  
 198 puncta density/10µm and Vglut1 puncta intensity of secondary/tertiary dendrites from neurons  
 199 treated or not with LiCl (1.5mM) for 7 days. N = 30 neurons per condition from three separate  
 200 experiments. Data shown in **A-C** are the mean ± s.e.m. and statistical significance was determined  
 201 using non-parametric Mann-Whitney test. \*\*\*p < 0.0005

202 **D)** Representative immunoblot anti-Synapsin<sup>1</sup>, GluA2, PSD95 and GAPDH with scatter plot show  
 203 quantification of these protein expression levels normalized with GAPDH and represented as  
 204 percentage of control of 18 DIV neuronal extract from neurons treated chronically or not with LiCl  
 205 (~3.5mM) from three separate experiments. **E)** Representative and quantification of some  
 206 presynaptic and postsynaptic protein expression levels normalized with GAPDH and represented as  
 207 percentage of control of 18 DIV neuronal extract from neurons treated or not with LiCl (1.5mM) for  
 208 4h from four separate experiments. Data shown in **D-E** are the mean ± s.e.m. and statistical  
 209 significance was determined with one sample t-test with hypothetical value 100 for controls.

210



Appendix 1 to Khayachi A, Ase A, Liao C, et al. Chronic lithium treatment alters the excitatory/inhibitory balance of synaptic networks and reduces mGluR5-PKC signalling in mouse cortical neurons. *J Psychiatry Neurosci* 2021. doi: 10.1503/jpn.200185

Copyright © 2021 The Author(s) or their employer(s).

To receive this resource in an accessible format, please contact us at [cmajgroup@cmaj.ca](mailto:cmajgroup@cmaj.ca).

Online appendices are unedited and posted as supplied by the authors.

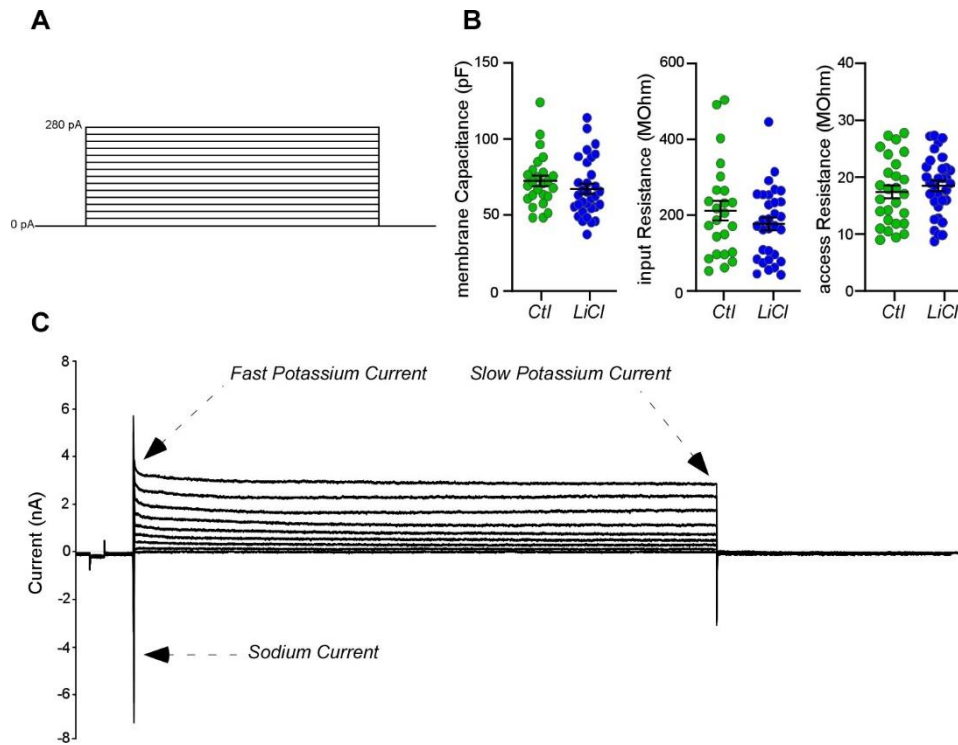

211

212 **Supplementary figure 3: Measurements of voltage-dependent sodium and potassium currents**

213 **A)** Waveform stimulus protocol of 20pA increment of 14 sweeps. **B)** Scatter plots show quantification  
214 of membrane properties prior current injection steps. Data are the mean  $\pm$  s.e.m. from  $\sim$ 32 neurons  
215 per condition from four independent experiments and statistical non-significance was determined by  
216 parametric unpaired t-test. **C)** Electrophysiological sample trace shows voltage-dependent sodium  
217 and potassium currents. Arrowheads in the positive current indicate the peak amplitude of fast and  
218 slow potassium currents. Arrowhead in the negative current indicates sodium current.

219

Copyright © 2021 The Author(s) or their employer(s).

To receive this resource in an accessible format, please contact us at cmajgroup@cmaj.ca.

Online appendices are unedited and posted as supplied by the authors.

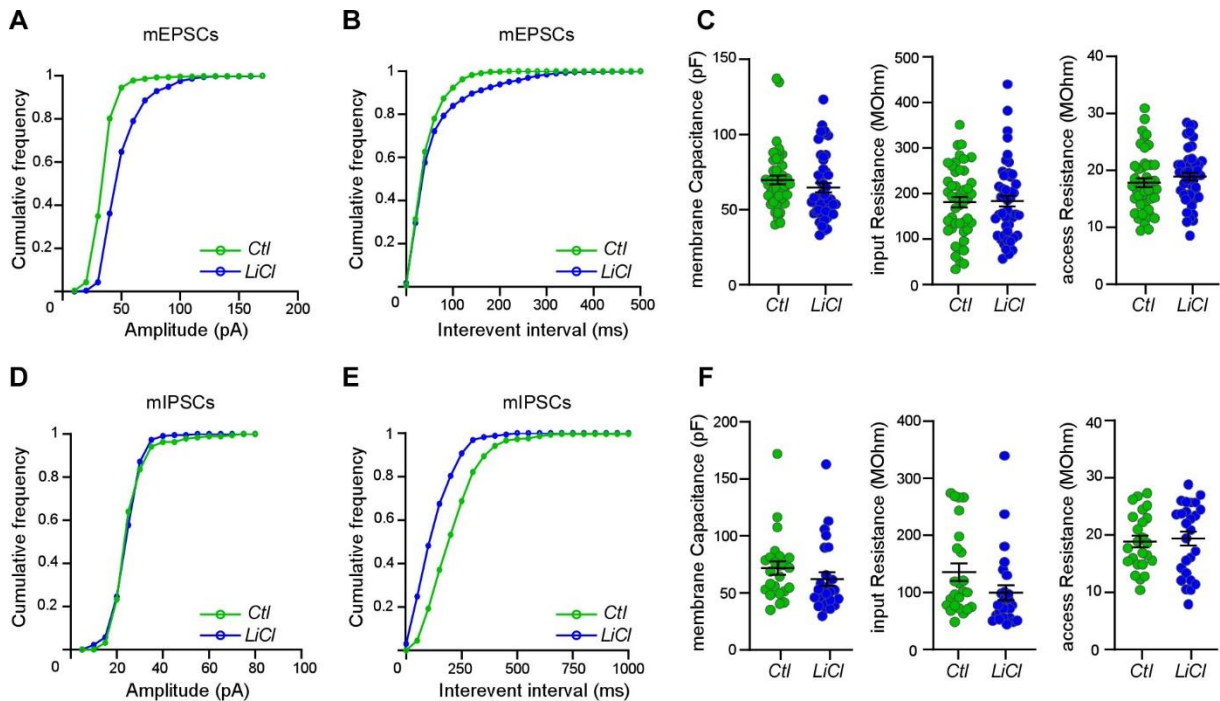

220

221

222 **Supplementary figure 4: Chronic lithium treatment alters the spontaneous excitatory and**  
223 **inhibitory synaptic transmission.**

224 Cumulative frequency for amplitude (A and D) and interevent intervals (B and E) of mEPSCs and  
225 mIPSCs respectively recorded from neurons treated or not chronically with LiCl (1.5mM). ~45  
226 neurons from four independent experiments for mEPSCs and ~26 neurons from three independent  
227 experiments for mIPSCs. C and F Scatter plots show quantification of membrane properties Data are  
228 the mean ± s.e.m. and statistical non-significance was determined by parametric unpaired t-test.

229

Appendix 1 to Khayachi A, Ase A, Liao C, et al. Chronic lithium treatment alters the excitatory/inhibitory balance of synaptic networks and reduces mGluR5-PKC signalling in mouse cortical neurons. J Psychiatry Neurosci 2021. doi: 10.1503/jpn.200185

Copyright © 2021 The Author(s) or their employer(s).

To receive this resource in an accessible format, please contact us at cmajgroup@cmaj.ca.

Online appendices are unedited and posted as supplied by the authors.

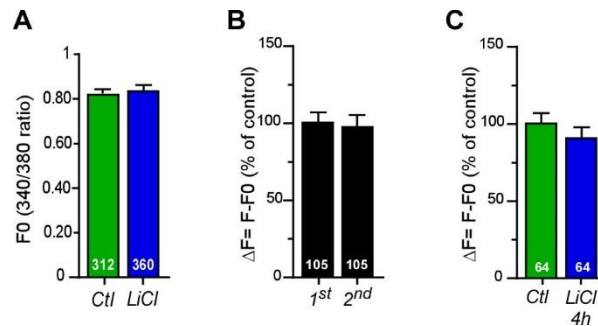

230

231 **Supplementary figure 5: Acute lithium treatment does not affect glutamate-induced calcium flux.**

232 **A)** Averaged baseline calcium levels prior drugs stimulations. **B)** Quantification of calcium changes as  
233 percentage of control upon two repeated glutamate (1 $\mu$ M) exposures in control neurons. **C)**  
234 Quantification of calcium changes as percentage of control upon glutamate (1 $\mu$ M) stimulation in  
235 mouse primary cortical neurons treated or not with LiCl (1.5mM) for 4h. Number of neurons is  
236 indicated on each histogram from 3 independent experiments. Data shown in **A-C** are the  
237 mean  $\pm$  s.e.m. and statistically non-significant with parametric unpaired t-tests.

238

Appendix 1 to Khayachi A, Ase A, Liao C, et al. Chronic lithium treatment alters the excitatory/inhibitory balance of synaptic networks and reduces mGluR5-PKC signalling in mouse cortical neurons. J Psychiatry Neurosci 2021. doi: 10.1503/jpn.200185

Copyright © 2021 The Author(s) or their employer(s).

To receive this resource in an accessible format, please contact us at cmajgroup@cmaj.ca.

Online appendices are unedited and posted as supplied by the authors.

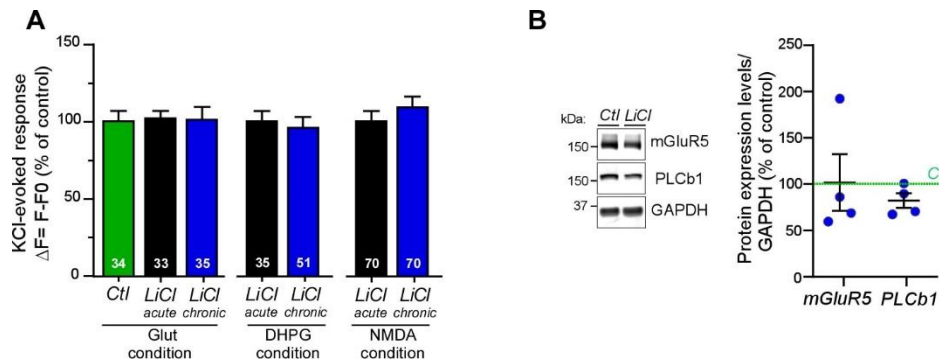

239

240 **Supplementary figure 6: Lithium treatment does not affect total calcium flux, or mGluR5 and PLC**  
241 **expression levels.**

242 **A)** Quantification of total calcium flux as percentage of control upon KCl stimulation in neurons  
243 treated or not with acute or chronic LiCl (1.5mM) upon glutamate, DHPG and NMDA conditions.  
244 Number of neurons is indicated on each histogram from 2 independent experiments. **B)**  
245 Representative immunoblot anti-mGluR5, PLCb1 and GAPDH with scatter plot show quantification of  
246 these protein expression levels normalized with GAPDH and represented as percentage of control of  
247 18 DIV neuronal extract from neurons treated chronically or not with LiCl (1.5mM) from four  
248 separate experiments. Data shown in **A-B** are the mean  $\pm$  s.e.m. and statistically non-significant with  
249 parametric unpaired t-tests for **A** and one sample t-test with hypothetical value 100 for controls for  
250 **B.**

251

Appendix 1 to Khayachi A, Ase A, Liao C, et al. Chronic lithium treatment alters the excitatory/inhibitory balance of synaptic networks and reduces mGluR5-PKC signalling in mouse cortical neurons. J Psychiatry Neurosci 2021. doi: 10.1503/jpn.200185

Copyright © 2021 The Author(s) or their employer(s).

To receive this resource in an accessible format, please contact us at cmajgroup@cmaj.ca.

Online appendices are unedited and posted as supplied by the authors.

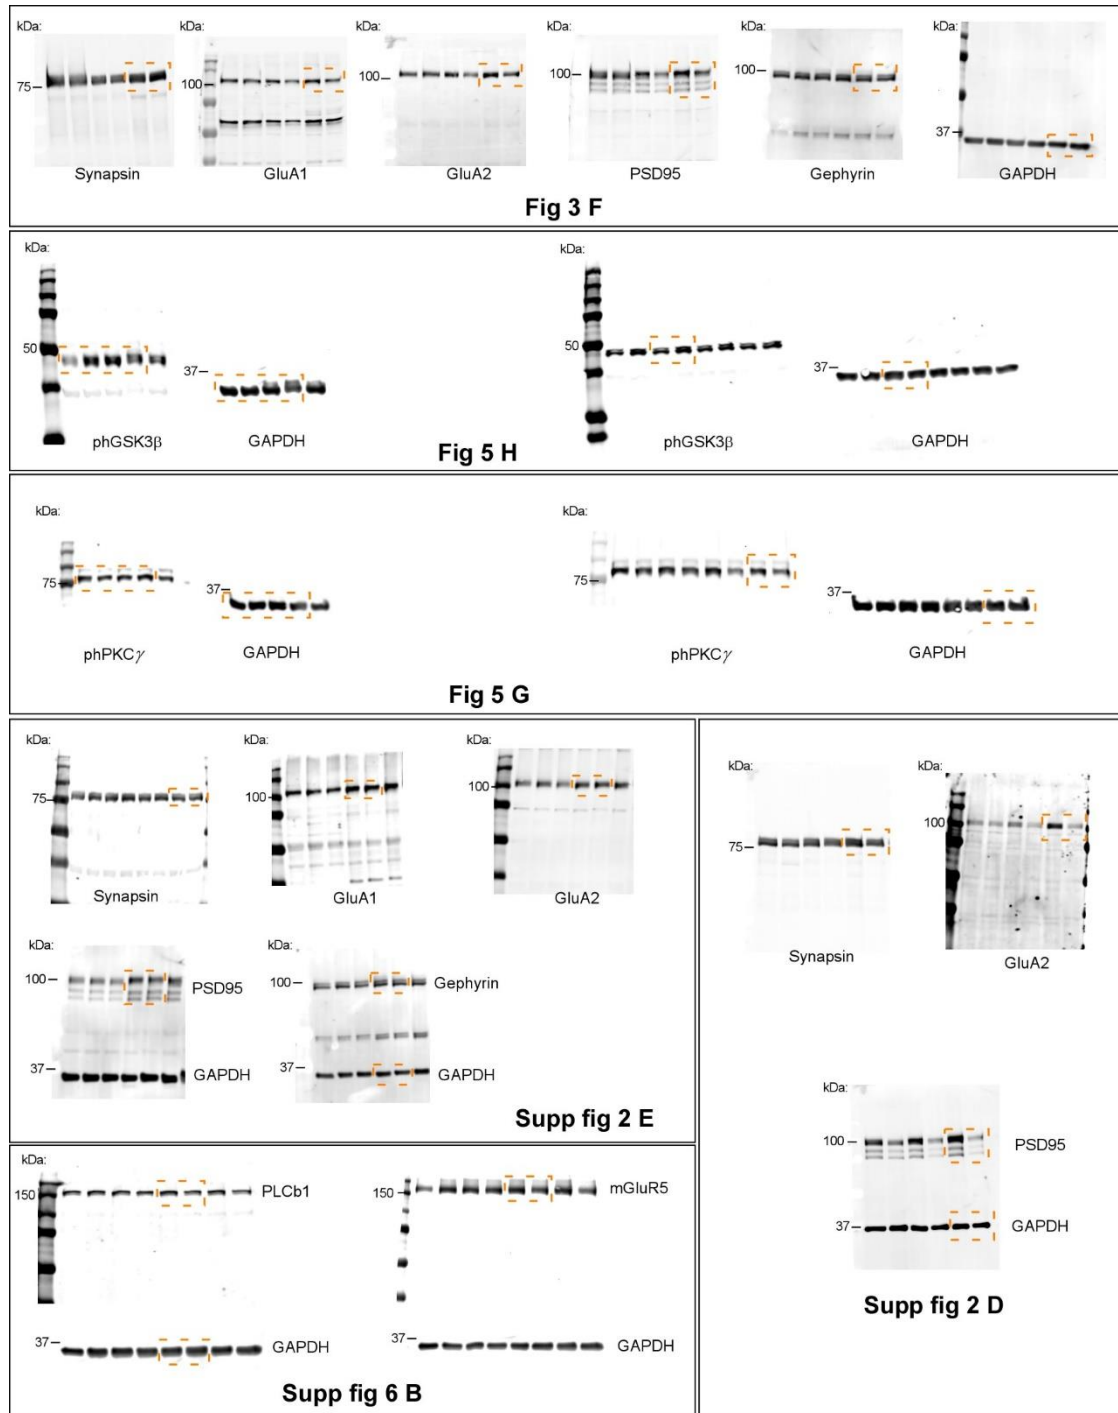

252

253 **Supplementary figure 7: Original uncropped blots.** Orange boxed regions represent the portion used  
 254 in the indicated figures.

255
